# Supplementary material for: Hyper-Raman spectroscopy of biomolecules
Source: Royal Society of Chemistry journal article supplement (doi:10.1039/d3an00641g), 2023-12-12
Supplement: d3an00641g1.pdf [file d3an00641g1.pdf]

## Supplemental Information: Hyper-Raman spectroscopy of biological energy sources and chiral biomolecules

Christopher B. Marble,<sup>\*a</sup> Kassie S. Marble,<sup>a</sup> Ethan B. Keene<sup>b,c</sup> Georgi I. Petrov,<sup>b</sup> and Vladislav V. Yakovlev<sup>a,b,d</sup>.

*a) Texas A&M University, Department of Physics and Astronomy, 4242 TAMU, College Station, TX 77843.*

*b) Texas A&M University, Department of Biomedical Engineering, 3120 TAMU, College Station, TX 77843.*

*c) Tarleton State University, Department of Chemistry, Geosciences, and Physics, 1333 W. Washington Stephenville, TX 76402.*

*d) Texas A&M University, Department of Electrical Engineering, 3127 TAMU, College Station, TX 77843.*

### Table of Contents

|                                                                                                                |            |
|----------------------------------------------------------------------------------------------------------------|------------|
| <b>A. Validation of Experimental Design Using Pure Liquid Data.....</b>                                        | <b>S2</b>  |
| A.1 Dimethyl Sulfoxide.....                                                                                    | S2         |
| A.2 Methanol .....                                                                                             | S4         |
| A.3 Ethanol.....                                                                                               | S5         |
| <b>B. Complete HRS Spectrum &amp; Comparison of Reported Hyper-Raman, Raman, and IR Absorption Bands .....</b> | <b>S7</b>  |
| B.1 D-Glucose.....                                                                                             | S7         |
| B.2 L-Arabinose .....                                                                                          | S9         |
| B.3 L-Alanine .....                                                                                            | S11        |
| B.4 L-Tartaric Acid.....                                                                                       | S13        |
| <b>C. UV Absorption Cross-Sections for Liquids Analyzed.....</b>                                               | <b>S15</b> |
| <b>References.....</b>                                                                                         | <b>S15</b> |

## A | Validation of Experimental Design Using Pure Liquid Data

### A.1 | Dimethyl Sulfoxide

Dimethyl sulfoxide (DMSO) belongs to the Cs point group (low symmetry group), meaning that all the 24 vibrational modes were expected to be IR, Raman, and hyper-Raman (HRS) active. At the low-frequency end of the experimental data, the bands observed in the Hyper Raman spectra from 305  $\text{cm}^{-1}$  to 667  $\text{cm}^{-1}$  were in great quantitative agreement with the bands observed in the Raman and infrared spectra. Two observed bands, the 900  $\text{cm}^{-1}$ , and 934  $\text{cm}^{-1}$  bands, were very weak in the hyper Raman spectra and were not reported in the Raman spectra of DMSO.<sup>2</sup> The S=O stretching region has been observed in both Raman and infrared spectra to be a convolution of several vibrational responses, likewise HRS cannot resolve the linewidths without deconvolution of features. Four H-C-H bending modes can be observed around 1290  $\text{cm}^{-1}$ , 1310  $\text{cm}^{-1}$ , 1411  $\text{cm}^{-1}$ , and 1436  $\text{cm}^{-1}$ ; however, unlike the 1310  $\text{cm}^{-1}$  and 1411  $\text{cm}^{-1}$  bands, the band around 1290  $\text{cm}^{-1}$  was seen only in HRS and IR. The 2914  $\text{cm}^{-1}$  weak HRS band of DMSO corresponds to a peak observed in IR spectra. The C-H asymmetric stretching mode was reported by all three techniques to be around 2997  $\text{cm}^{-1}$ . The full HRS spectra is provided as Fig. S1.

Comparing the depolarization ratio data from this experiment against the reported depolarization ratio ( $\rho_{HR} = I_{HR \perp} / I_{HR \parallel}$ ) data in Ref. 1, we find our reported values tend to trend higher on average than Ref. 1 (Table S1 with  $> 2\sigma$  deviation bolded for emphasis). Furthermore, the reported depolarization ratio of the hyper-Rayleigh line was dramatically larger for our experiment. These differences may, in part, be a result of the near-resonant excitation of DMSO in our experiment (532 nm excitation), compared to Ref. 1 (1064 nm excitation experiment).

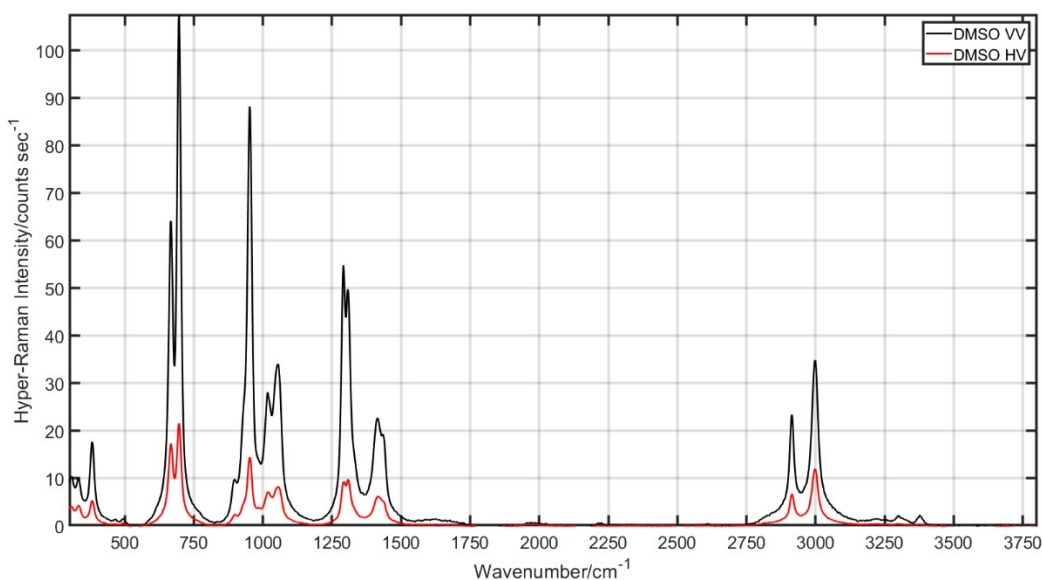

Fig. S1 The hyper-Raman spectra of DMSO for the VV and HV geometry are shown in black and red respectively post Savitzky-Golay filtering.

**Table S1.** Peak assignments for DMSO with their measured relative intensities, and depolarization ratios.

| HRS (cm <sup>-1</sup> )* | Band Assignment <sup>2,3</sup> | I <sub>Ratio</sub> (x1000) | $\rho$               | $\rho^1$    |
|--------------------------|--------------------------------|----------------------------|----------------------|-------------|
| 0                        | Hyper-Rayleigh                 | 1000 ± 30                  | <b>0.13 ± 0.01</b>   | <b>0.45</b> |
| 305                      | $\beta(C-S-C)$                 | 9.4 ± 0.4                  | 0.39 ± 0.02          | 0.35        |
| 334                      | $\beta_{out}(C-S=O)$           | 7.7 ± 0.3                  | <b>0.44 ± 0.02</b>   | <b>0.23</b> |
| 382                      | $\beta_{in}(C-S=O)$            | 12.3 ± 0.4                 | <b>0.317 ± 0.008</b> | <b>0.26</b> |
| 667                      | $\nu_{sym}(C-S)$               | 44 ± 1                     | 0.288 ± 0.004        | 0.28        |
| 696                      | $\nu_{as}(C-S)$                | 63 ± 2                     | <b>0.225 ± 0.002</b> | <b>0.19</b> |
| 900                      | Not Assigned                   | Very Weak                  |                      | NR          |
| 934                      | Not Assigned                   | Very Weak                  |                      | NR          |
| 955                      | $r(CH)$                        | 61 ± 2                     | <b>0.170 ± 0.009</b> | <b>0.14</b> |
| 1012                     | $r(CH)$                        | 30 ± 1                     | 0.27 ± 0.01          | NR          |
| 1040-1060*               | $\nu(S=O), \nu$ (multiple)     | 41 ± 1                     | 0.25 ± 0.008         | NR          |
| 1290                     | $\beta(HCH)$                   | 31 ± 1                     | <b>0.18 ± 0.01</b>   | <b>0.13</b> |
| 1310                     | $\beta(HCH)$                   | 30 ± 1                     | 0.20 ± 0.01          | 0.21        |
| 1411                     | $\beta(HCH)$                   | 17.0 ± 0.7                 | 0.261 ± 0.008        | NR          |
| 1436                     | $\beta(HCH)$                   | 12.6 ± 0.8                 | 0.26 ± 0.02          | NR          |
| 2914                     | $\nu_{sym}(CH)$                | 20 ± 1                     | 0.30 ± 0.02          | NR          |
| 2997                     | $\nu_{as}(CH)$                 | 43 ± 3                     | 0.34 ± 0.01          | NR          |

\*Where the uncertainty is unstated, it is +/- 1 cm<sup>-1</sup>.

Abbreviations: sym=symmetry; as, asymmetric; ip, in-plane; out, out of plane;  $\nu$ , stretching;  $\beta$ , bending; r, rocking

## A.2 | Methanol

The HRS spectra and depolarization ratios of alcohols including methanol was previously reported by Ref. 4. The depolarization ratios and HRS spectra detected with our system was summarized and compared to the reported values for methanol (see Table S2). We find, in general, closer experimental agreement between our results and Ref. 4 than our DMSO results and Ref. 1 (see bolded entries in Table S2 for discrepancies).

As shown in Fig. S2 and Table S2, the high-wavenumber region of the HRS spectra of methanol was observed to contain the typical OH stretches ( $3200\text{ cm}^{-1}$  -  $3600\text{ cm}^{-1}$ ) and CH stretches of the  $\text{CH}_3$  group was seen ( $2983\text{ cm}^{-1}$ ,  $2983\text{ cm}^{-1}$ ,  $2835\text{ cm}^{-1}$ ) as were previously reported in literature. We report an additional, very weak, band around ( $2910\text{ cm}^{-1}$ ) not previously reported for HRS in Ref. 4. The middle wavenumber range was also mostly characterized by the  $1446\text{ cm}^{-1}$ ,  $1156\text{ cm}^{-1}$ ,  $1109\text{ cm}^{-1}$  bands which were identified as CH deformations and rocking motions of the  $\text{CH}_3$  group. A strong peak observed around  $1028\text{ cm}^{-1}$  was identified as a CO stretch. In the fingerprint regime, we observed one COH torsional peaks at  $760\text{ cm}^{-1}$  and an O-H out-of-plane bending band at  $630\text{ cm}^{-1}$  which were broadened via hydrogen bonding.

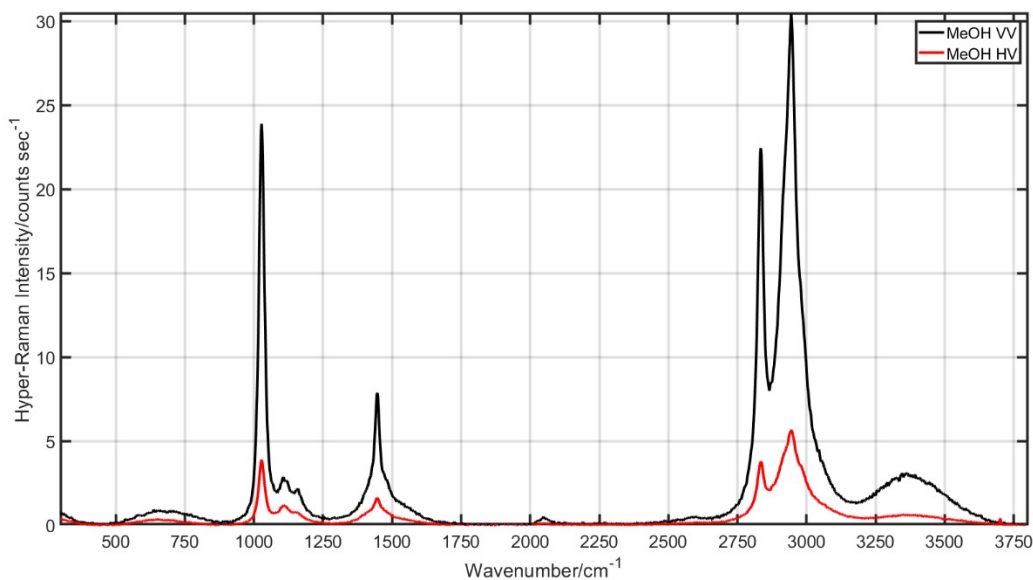

Fig. S2 The hyper-Raman spectra of methanol for the VV and HV geometry are shown in black and red respectively post Savitzky-Golay filtering.

**Table S2.** Peak assignments for methanol with relative intensities (to the hyper-Rayleigh line) and depolarization ratios.

| HRS ( $\text{cm}^{-1}$ )* | Band Assignment                 | $I_{\text{Ratio}}$ ( $\times 1000$ ) | $\rho$               | $\rho^4$    |
|---------------------------|---------------------------------|--------------------------------------|----------------------|-------------|
| 0                         | Hyper-Rayleigh                  | 1000 +/- 61                          | 0.17 +/- 0.03        | NR          |
| 630 (est.)                | $\beta(\text{COH})$             | 12 +/- 1                             | <b>0.40 +/- 0.04</b> | <b>0.6</b>  |
| 760                       | $\beta(\text{OH})$ out-of-plane | 8.4 +/- 0.8                          | 0.19 +/- 0.03        | NR          |
| 1028 +/- 1                | $\nu(\text{CO})$                | 58 +/- 4                             | 0.17 +/- 0.03        | 0.17        |
| 1109 +/- 2                | $r(\text{CH}_3)$                | 13 +/- 1                             | 0.43 +/- 0.04        | 0.42        |
| 1156 +/- 2                | $r(\text{CH}_3)$                | 8.3 +/- 0.6                          | <b>0.38 +/- 0.03</b> | <b>0.25</b> |
| 1446 +/- 1                | $def\ sym(\text{CH}_3)$         | 18 +/- 1                             | 0.21 +/- 0.02        | 0.19        |
| 2835 +/- 1                | $\nu_{sym}(\text{CH}_3)$        | 85 +/- 6                             | 0.20 +/- 0.02        | 0.18        |
| 2910 +/- 3                | NR                              | 72 +/- 7                             | 0.23 +/- 0.03        | NR          |
| 2944 +/- 2                | $\text{CH}_3$ (Fermi Resonance) | 122 +/- 10                           | 0.19 +/- 0.02        | 0.21        |
| 2983 +/- 2                | $\nu_{as}(\text{CH}_3)$         | 59 +/- 5                             | 0.28 +/- 0.03        | NR          |
| 3200-3600                 | $\nu(\text{OH})$                | Multi-Band                           | 0.2 (est.)           | 0.15        |

\*Where the uncertainty is unstated, it is +/-  $1\text{ cm}^{-1}$ .

Abbreviations: sym, symmetry; as, asymmetric;  $\nu$ , stretching;  $\beta$ , bending; r, rocking; def, deformation

### A.3 | Ethanol

Ethanol, like methanol, has been previously studied using HRS.<sup>4</sup> As can be seen in Table S2, our depolarization ratios and observed HRS bands are in good agreement with the previously published results for ethanol (as can be seen in Table S2). The reported discrepancies at low wavenumbers may be in part, due to differences in our background subtraction methods for the ultrabroad response seen in hydrogen bonding liquids (see Ref. 3 supplement for our method applied to HRS of water where the background was a larger fraction of the total low wavenumber signal). Additionally, the bands we observe in the OH ( $3,125\text{ cm}^{-1}$  -  $3,625\text{ cm}^{-1}$ ) and CH ( $3,000\text{ cm}^{-1}$  -  $2831\text{ cm}^{-1}$ ) stretching regions also agree with the previously observed spectra. Like water and methanol, we also observed a hydrogen bonding broadened response around  $600\text{ cm}^{-1}$ . We report, but do not characterize some very weak responses that were observed around  $2700\text{ cm}^{-1}$ ,  $2745\text{ cm}^{-1}$ ,  $2831\text{ cm}^{-1}$ .

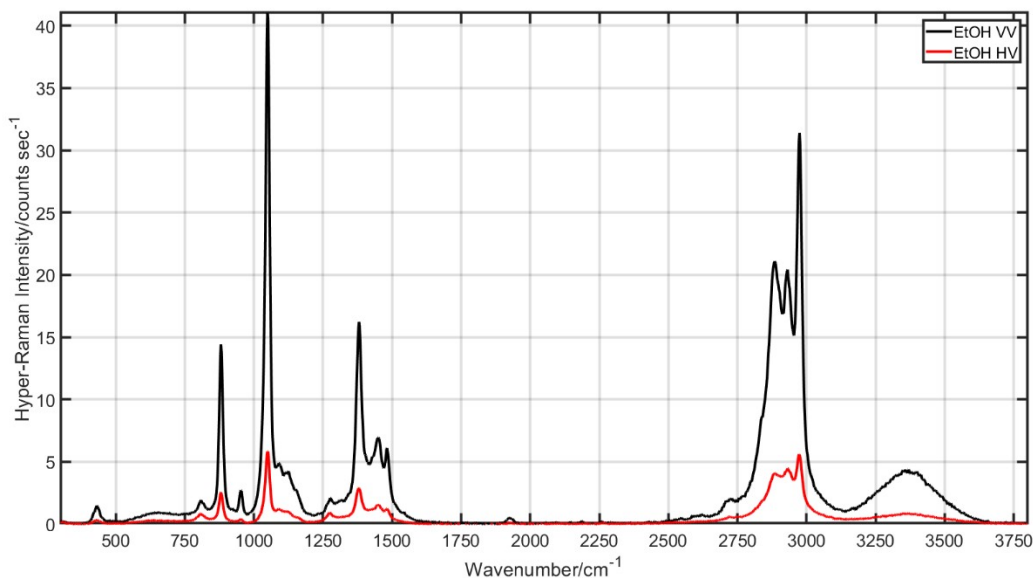

Fig. S3 The hyper-Raman spectra of ethanol for the VV and HV geometry are shown in black and red respectively post Savitzky-Golay filtering.

**Table S3.** Peak assignments for ethanol with relative intensities (to the hyper-Rayleigh line) and depolarization ratios.

| HRS ( $\text{cm}^{-1}$ )* | Band Assignment                                             | $I_{\text{Ratio}} (\times 1000)$ | $\rho$               | $\rho^4$    |
|---------------------------|-------------------------------------------------------------|----------------------------------|----------------------|-------------|
| 0                         | Hyper-Rayleigh                                              | 1000 +/- 43                      | 0.18 +/- 0.03        | NA          |
| 432                       | $\beta(\text{CCO})$                                         | 6.0 +/- 0.3                      | <b>0.23 +/- 0.02</b> | <b>0.27</b> |
| 653 (est.)                | $\beta(\text{COH})$                                         | NA                               | <b>~0.30</b>         | <b>0.28</b> |
| 810                       | $r(\text{CH}_2), r(\text{CH}_3)$                            | 4.6 +/- 0.3                      | 0.58 +/- 0.07        | 0.44        |
| 881                       | $\nu_{\text{sym}}(\text{CCO})$                              | 34 +/- 1                         | <b>0.18 +/- 0.01</b> | <b>0.21</b> |
| 953                       | $r(\text{CH}_3)$                                            | 5.0 +/- 0.3                      | 0.21 +/- 0.02        | NR          |
| 1049                      | $\nu_{\text{as}}(\text{CCO})$                               | 124 +/- 5                        | <b>0.15 +/- 0.01</b> | <b>0.18</b> |
| 1083 (est.)               | $r(\text{CH}_3), \text{COH}_{\text{def}}$                   | NA                               | ~0.24                | 0.23        |
| 1276                      | $\omega(\text{CH}_2)$                                       | 8.0 +/- 0.7                      | 0.49 +/- 0.05        | 0.57        |
| 1381                      | $\omega(\text{CH}_2), \text{Def}_{\text{sym}}(\text{CH}_3)$ | 58 +/- 4                         | 0.18 +/- 0.02        | 0.21        |
| 1448 +/- 2                | Def as $(\text{CH}_3)$                                      | 39 +/- 3                         | 0.23 +/- 0.02        | 0.25        |
| 1484                      | Def $(\text{CH}_2)$                                         | 16 +/- 1                         | 0.22 +/- 0.03        | 0.19        |
| 2700 (est.)               | NR                                                          | 11 +/- 1                         | 0.30 +/- 0.04        | NR          |
| 2745 (est.)               | NR                                                          | 18 +/- 1                         | 0.28 +/- 0.03        | NR          |
| 2831 +/- 2                | NR                                                          | 31 +/- 2                         | 0.22 +/- 0.03        | NR          |

|            |                        |            |               |      |
|------------|------------------------|------------|---------------|------|
| 2883 +/- 2 | $\nu_{sym}(CH_3)$      | 165 +/- 10 | 0.19 +/- 0.02 | 0.21 |
| 2933 +/- 2 | $CH_3$ Fermi resonance | 148 +/- 10 | 0.23 +/- 0.03 | 0.28 |
| 2975       | $\nu_{as}(CH_3)$       | 130 +/- 7  | 0.21 +/- 0.02 | 0.21 |
| 3361       | $\nu(OH)$              | 197 +/- 8  | 0.23 +/- 0.02 | 0.19 |

\*Where the uncertainty is unstated, it is +/- 1 cm<sup>-1</sup>.

Abbreviations: sym=symmetry; as, asymmetric;  $\nu$ , stretching;  $\tau$ , twisting;  $\omega$ , wagging;  $\beta$ , bending; r, rocking

## B | Complete HRS Spectrum & Comparison of Reported Hyper-Raman, Raman, and IR Absorption Bands

In the following sections, we provide the full HRS spectra for each of the biomolecules presented in the article (Figs. 3-6 in the article show the spectra from 300  $\text{cm}^{-1}$  to 1800  $\text{cm}^{-1}$ ).

### B.1 | D-Glucose

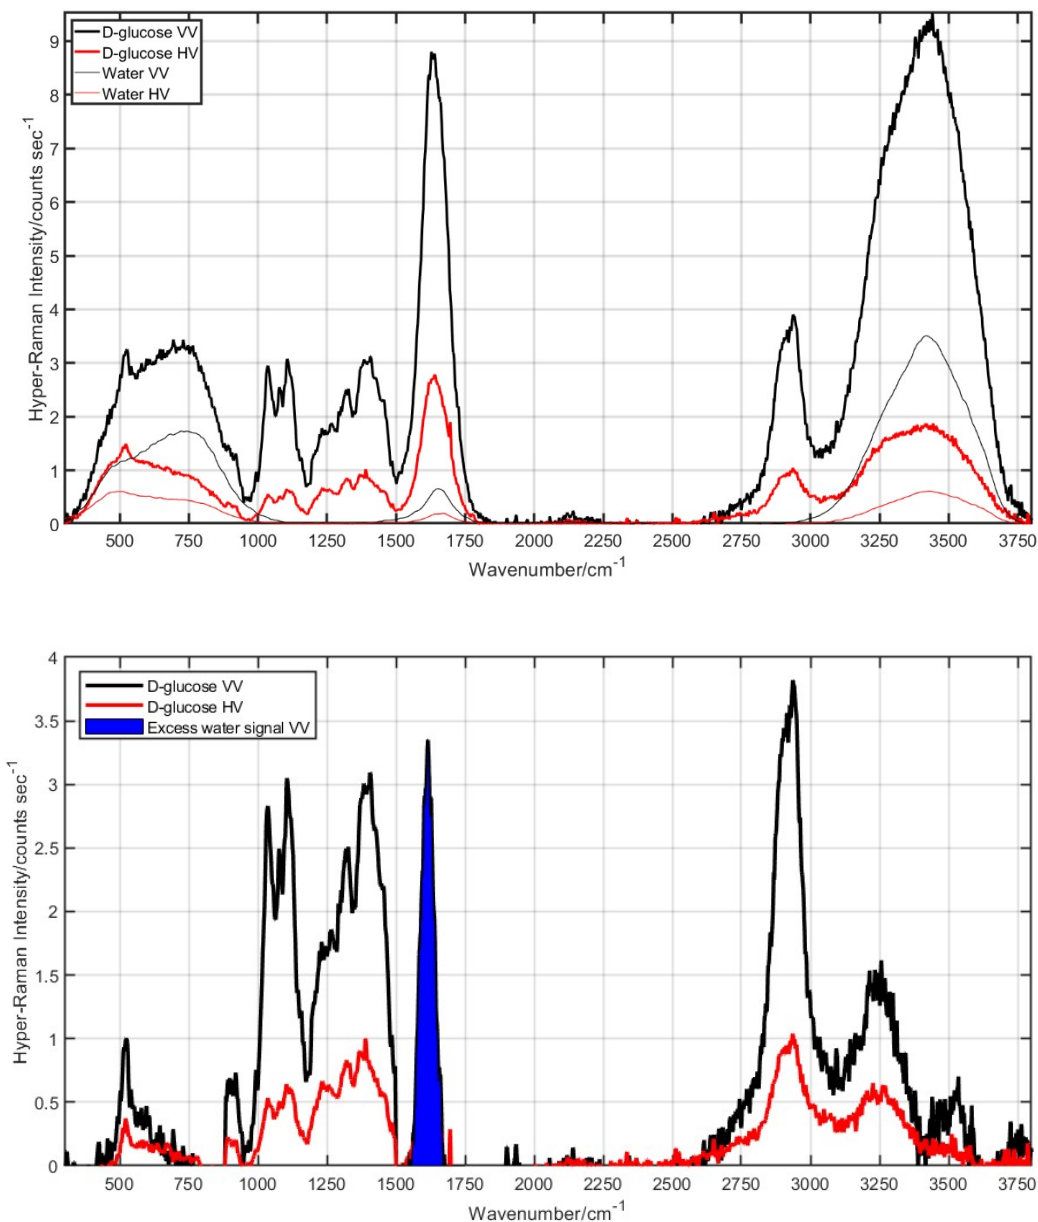

Fig. S4 (Top) The hyper-Raman spectra of D-glucose (in aqueous solution) for the VV and HV geometry are shown in black and red respectively post Savitzky-Golay filtering. Deionized water spectra under identical conditions are shown as thin lines. (Bottom) The hyper-Raman spectra of D-glucose (post-water subtraction) for the VV and HV geometry are shown in black and red respectively post Savitzky-Golay filtering.

Note in Fig. S4 bottom the presence of a false redshifted OH bend signal ( $\sim 1615 \text{ cm}^{-1}$ ) from the water background.



**Table S4.** Comparison of D-glucose vibrational modes for HRS with Raman and infrared absorption.

| Assignment                                          | HRS (cm <sup>-1</sup> )* | RS <sup>5</sup> (cm <sup>-1</sup> ) | IR <sup>5</sup> (cm <sup>-1</sup> ) |
|-----------------------------------------------------|--------------------------|-------------------------------------|-------------------------------------|
| Hyper-Rayleigh                                      | 0                        | 0                                   | NA                                  |
| $\beta_{ip}(CCC), \beta_{ip}(CCO), \beta_{ip}(OCO)$ | 522                      | 542                                 | 537                                 |
| $\beta_{ip}(CCH), \beta_{ip}(CCO)$                  | 903 +/- 2                | 914                                 | 915                                 |
| $\nu(CC), \nu(CO), \beta_{ip}(COH)$                 | 1037                     | 1022                                | 1014                                |
| $\nu(CC), \nu(CO), \beta_{ip}(COH)$                 | 1076                     | 1074                                | NR                                  |
| $\nu(CC), \nu(CO), \beta_{ip}(COH)$                 | 1110 +/- 2               | NR                                  | 1109                                |
| $\tau(CH_2)$                                        | 1248 +/- 2               | NR                                  | NR                                  |
| $\omega(CH_2)$                                      | 1322 +/- 3               | 1333                                | 1338                                |
| $\omega(CH_2)$                                      | 1386 +/- 2               | 1373                                | 1371                                |
| $\delta(CH_2)$                                      | 1449 +/- 3               | 1460                                | 1457                                |
| $\nu_{sym}(CH)$                                     | 2890 (est.)              | 2891                                | 2891                                |
| $\nu_{sym}(CH)$                                     | 2940 (est.)              | 2947                                | 2943                                |
| $\nu_s(CH)$                                         | 2950 (est.)              | 2962                                | NR                                  |
| $\nu(OH)$                                           | 3230 (est.)              | 3265                                | 3296                                |
| $\nu(OH)$                                           | 3520 (est.)              | NR                                  | NR                                  |

\*Where the uncertainty is unstated, it is +/- 1 cm<sup>-1</sup>.

Abbreviations: sym=symmetry; as, asymmetric; ip, in-plane;  $\nu$ , stretching;  $\delta$ , scissoring;  $\tau$ , twisting;  $\omega$ , wagging;  $\beta$ , bending; r, rocking

## B.2 | L-Arabinose

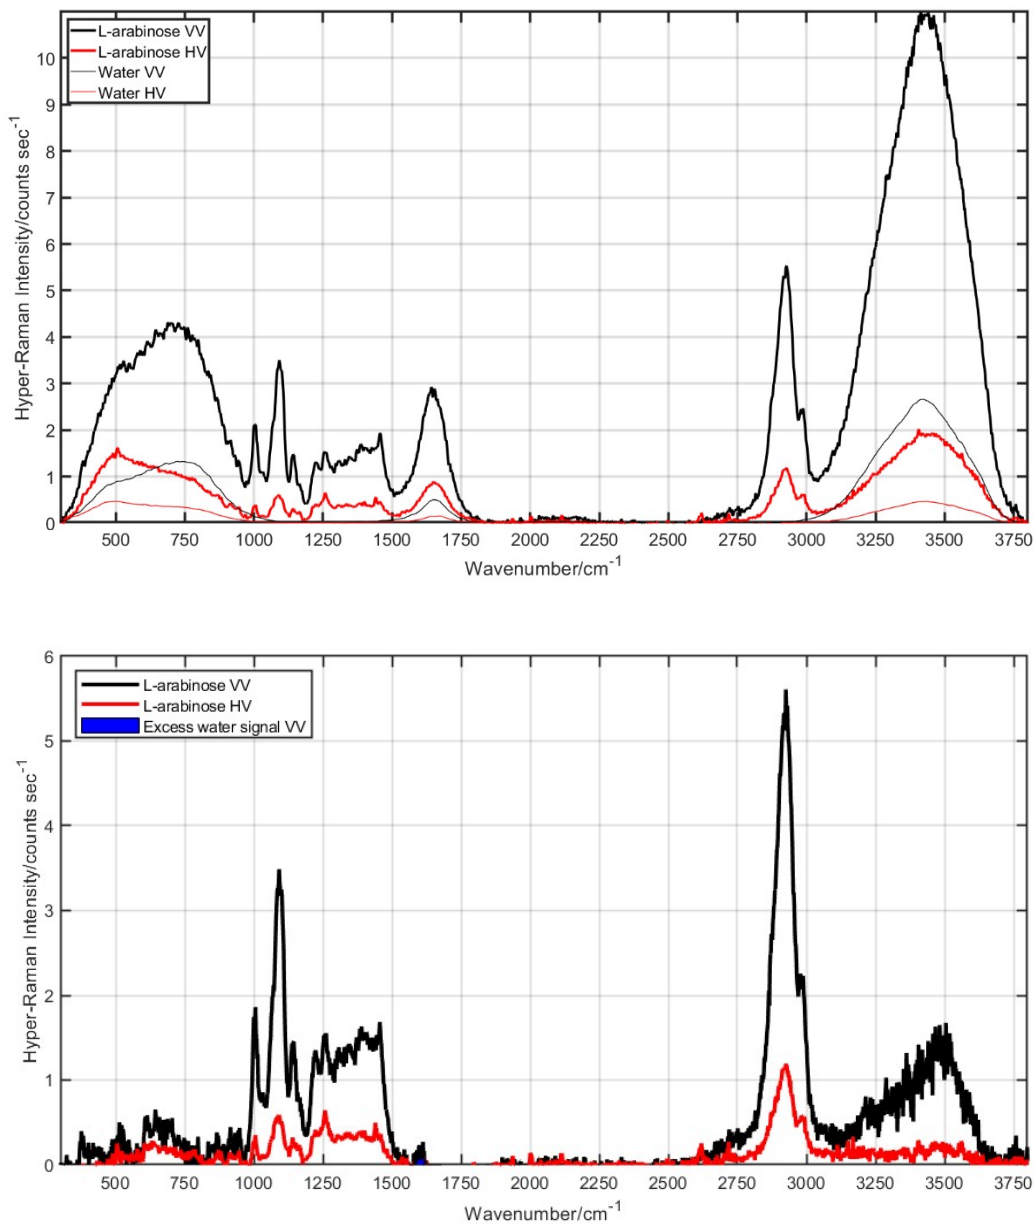

Fig. S5 (Top) The hyper-Raman spectra of L-arabinose (in aqueous solution) for the VV and HV geometry are shown in black and red respectively post Savitzky-Golay filtering. Deionized water spectra under identical conditions are shown as thin lines. (Bottom) The hyper-Raman spectra of L-arabinose (post-water subtraction) for the VV and HV geometry are shown in black and red respectively post Savitzky-Golay filtering.

**Table S5.** Comparison of L-arabinose vibrational modes for HRS with Raman and infrared absorption.

| Band Assignment                          | HRS (cm <sup>-1</sup> )* | RS <sup>5</sup> (cm <sup>-1</sup> ) | IR <sup>5</sup> (cm <sup>-1</sup> ) |
|------------------------------------------|--------------------------|-------------------------------------|-------------------------------------|
| Hyper-Rayleigh                           | 0                        | 0                                   | NA                                  |
| $\beta_{ip}(COC)$                        | 382                      | NR                                  | 399                                 |
| $\beta_{ip}(COC)$                        | NR                       | 430                                 | 431                                 |
| $\beta_{ip}(CCC)$ , ring def             | NR                       | NR                                  | 501                                 |
| $\beta_{ip}(CCC)$ , ring def             | 510                      | 511                                 | NR                                  |
| $\beta_{ip}(CCC)$ , ring def             | 577                      | 579                                 | 578                                 |
| $\beta_{ip}(OCO)$                        | 612                      | 612                                 | 602                                 |
| $\beta_{ip}(OCO)$                        | 645                      | NR                                  | NR                                  |
| $\beta_{ip}(OCO)$                        | 700                      | 698                                 | NR                                  |
| $\beta_{ip}(CH)$                         | 872                      | 897                                 | 891                                 |
| $\beta_{ip}(CCH)$                        | 919                      | 928                                 | NR                                  |
| $\beta_{ip}(OCH)$                        | 944                      | NR                                  | 942                                 |
| $\nu_{as}(COC), \nu(CC) \beta_{ip}(CCH)$ | 1004                     | 993                                 | 991                                 |
| $\nu(CO), \nu(CC) \beta_{ip}(COH)$       | 1062 +/- 3               | 1051                                | 1048                                |
| $\nu(CO)$                                | 1094                     | 1096                                | 1089                                |
| $\nu(C - C)$                             | 1145                     | 1136                                | NR                                  |
| $\tau(CH_2)$                             | 1219                     | NR                                  | 1229                                |
| $\tau(CH_2)$                             | 1259                     | 1260                                | 1256                                |
| $\omega(CH_2)$                           | 1307                     | 1312                                | 1314                                |
| $\omega(CH_2)$                           | 1345                     | 1356                                | 1354                                |
| $\omega(CH_2)$                           | 1373                     | 1375                                | 1371                                |
| $\delta(CH_2)$                           | 1450                     | 1449, 1476                          | 1473                                |
| $\nu_s(CH)$                              | 2887                     | 2891                                | 2894                                |

|                  |                |      |            |
|------------------|----------------|------|------------|
| $\nu_s(CH_2)$    | 2929           | 2939 | 2938       |
| $\nu(CH)$        | 2953           | 2959 | 2955       |
| $\nu_{as}(CH)$   | 2976           | 2970 | 2967       |
| $\nu_{as}(CH_2)$ | 3005           | 3001 | 2997       |
| $\nu(OH)$        | 3100 -<br>3600 | 3337 | 3324, 3524 |

---

\*Where the uncertainty is unstated, it is +/- 1 cm<sup>-1</sup>.

Abbreviations: sym=symmetry; as, asymmetric;  $\nu$ , stretching;  $\tau$ , twisting;  $\omega$ , wagging;  $\beta$ , bending;  $\delta$ , *scissoring*; r, rocking

### B.3 | L-Alanine

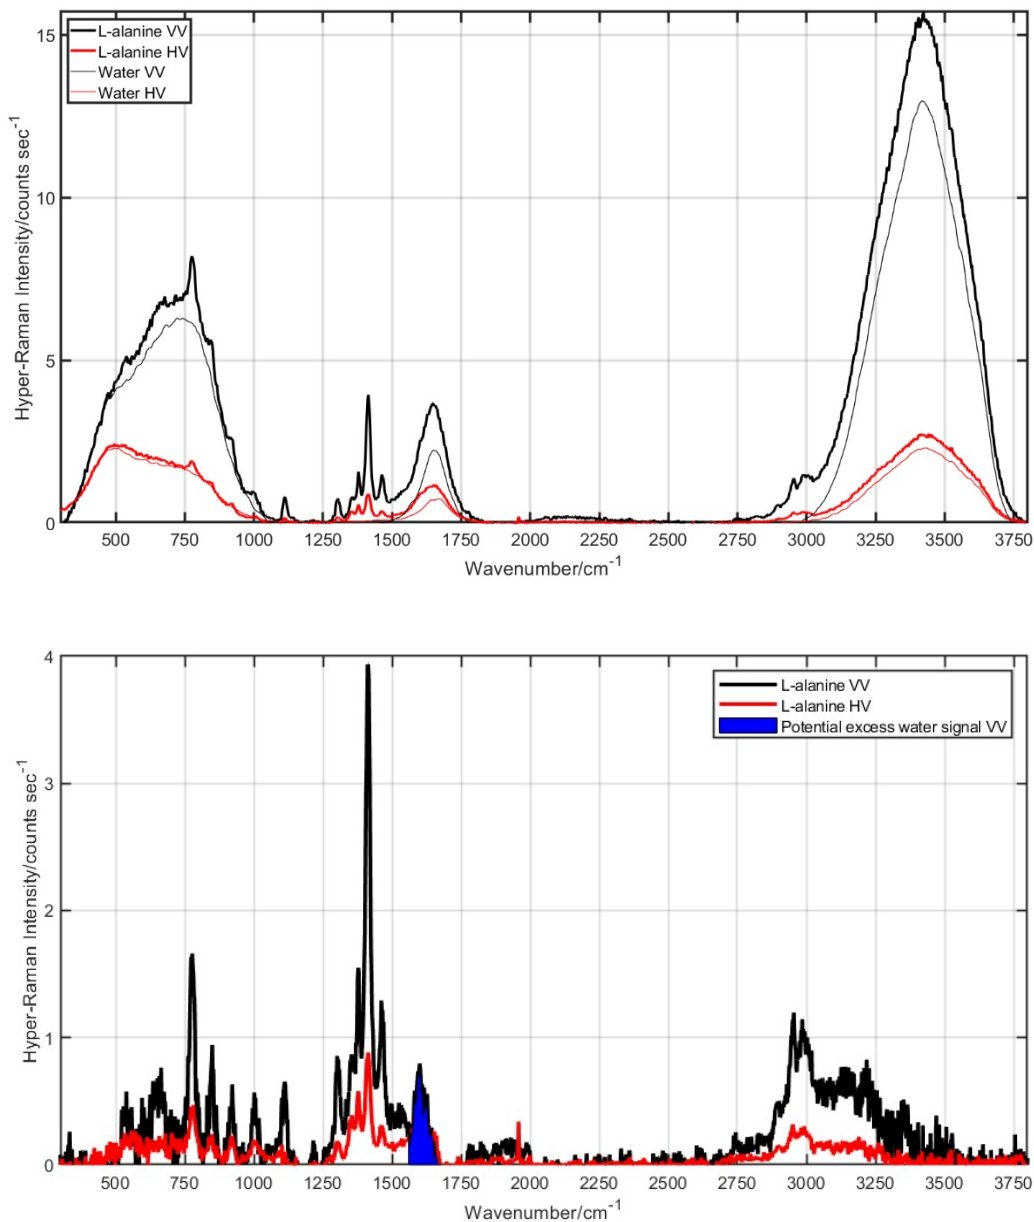

Fig. S6 (Top) The hyper-Raman spectra of L-alanine (in aqueous solution) for the VV and HV geometry are shown in black and red respectively post Savitzky-Golay filtering. Deionized water spectra under identical conditions are shown as thin lines. (Bottom) The hyper-Raman spectra of L-alanine (post-water subtraction) for the VV and HV geometry are shown in black and red respectively post Savitzky-Golay filtering.

**Table S6.** Comparison of L-alanine vibrational modes for HRS with Raman and infrared absorption.

| Assignment                                            | HRS (cm <sup>-1</sup> )* | RS <sup>6,7</sup> (cm <sup>-1</sup> ) | IR <sup>6,7</sup> (cm <sup>-1</sup> ) |
|-------------------------------------------------------|--------------------------|---------------------------------------|---------------------------------------|
| $r(COO^-), \nu(CC), \delta(CCN), \nu(CN)$             | 541                      | 553                                   | 544                                   |
| $\delta(COO^-), \delta(CCN), \nu(CC), r(COO^-)$       | 648                      | 654                                   | 646                                   |
| $\omega(COO^-), \delta(CCC)$                          | 777                      | 781                                   | 769                                   |
| $\delta(COO^-), \nu_3(COO^-), \nu(C-C)$ and $\nu(CN)$ | 847                      | 862                                   | 851                                   |
| $\nu(CN), r(CH_3), \nu(CC)$                           | 920                      | 930                                   | 919                                   |
| $\nu(CC), r(CH_3)$                                    | 1005                     | 1024                                  | 1014                                  |
| $r(NH_3^+)$                                           | 1112                     | 1125                                  | 1114                                  |
| $\nu_{as}(CCN), r(CCN)$                               | 1142 +/-2                | 1151                                  | 1149                                  |
| $\nu_{sym}(CCO^-), r_{ip}(NH_3^+), r(CH)$             | 1304                     | 1316                                  | 1307                                  |
| $\delta(CH_3), \delta(NH_3^+)$                        | 1353                     | 1368                                  | 1354                                  |
| $\delta_{as}(CH_3), \nu_{sym}(COO^-)$                 | 1379                     | 1388                                  | 1376                                  |
| $\nu_{sym}(COO^-), \nu(CC), \delta_{as}(CH_3)$        | 1413                     | 1423                                  | 1418                                  |
| $\delta_{as}(CH_3)$                                   | 1462                     | 1469                                  | 1462                                  |
| $\delta_{sym}(NH_3)$                                  | Very Weak                | 1527                                  | 1523                                  |
| $\delta_{as}(NH_3)$                                   | 1600 (est.)              | 1604                                  | 1592                                  |
| $rp(CH_3)$                                            | 2747 (est.)              | 2768                                  | NR                                    |
| $\nu_{sym}(CH_3)$                                     | 2899                     | 2897                                  | NR                                    |
| $\nu(CH_3)$                                           | 2950                     | 2960                                  | 2940                                  |
| $\nu(CH_3)$                                           | 2984                     | 2991                                  | 2982                                  |
| $\nu(NH_3)$                                           | 3007                     | 3011                                  | 3002                                  |
| $\nu_{as}(NH_3)$                                      | 3093 +/- 7               | NR                                    | NR                                    |

\*Where the uncertainty is unstated, it is +/- 1 cm<sup>-1</sup>.

Abbreviations: sym=symmetry; as, asymmetric;  $\nu$ , stretching;  $\tau$ , twisting;  $\omega$ , wagging;  $\delta$ , scissoring;  $\beta$ , bending; r, rocking

## B.4 | L-Tartaric Acid

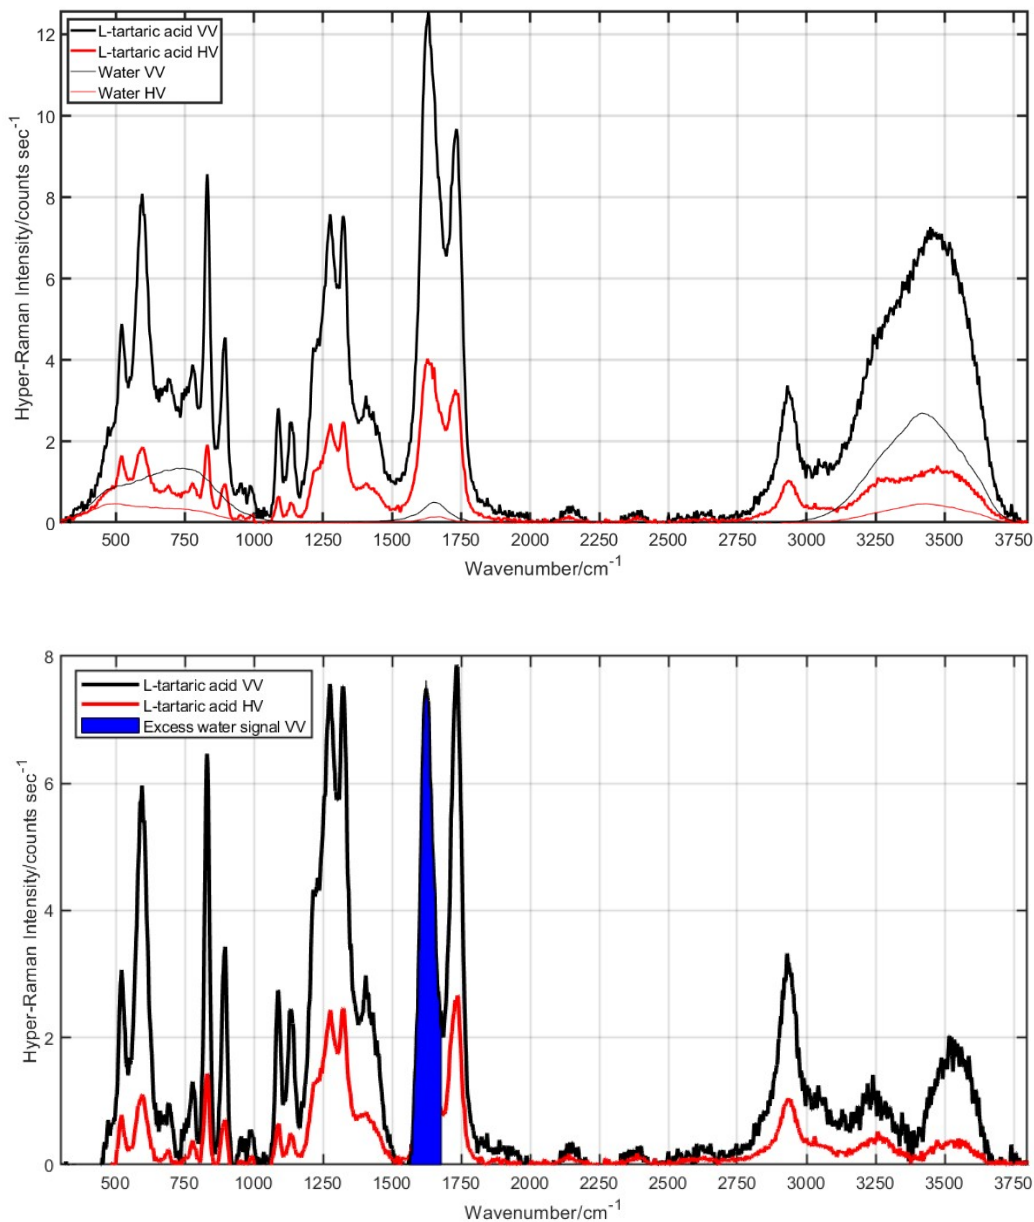

Fig. S7 (Top) The hyper-Raman spectra of L-tartaric acid (in aqueous solution) for the VV and HV geometry are shown in black and red respectively post Savitzky-Golay filtering. Deionized water spectra under identical conditions are shown as thin lines. (Bottom) The hyper-Raman spectra of L-tartaric acid (post-water subtraction) for the VV and HV geometry are shown in black and red respectively post Savitzky-Golay filtering.

**Table S7.** Comparison of L-tartaric acid vibrational modes for HRS with Raman and infrared absorption.

| Assignment                                 | HRS (cm <sup>-1</sup> )* | RS <sup>8</sup> (cm <sup>-1</sup> ) | IR <sup>8</sup> (cm <sup>-1</sup> ) |
|--------------------------------------------|--------------------------|-------------------------------------|-------------------------------------|
| Hyper-Rayleigh                             | 0                        | 0                                   | NA                                  |
| $\tau(\text{COOH})$                        | 522                      | 530                                 | 520                                 |
| $\tau(\text{COOH})$                        | 595                      | 582                                 | 580                                 |
| $\tau(\text{COOH})$                        | 686                      | 680                                 | 665                                 |
| $\beta_{ip}(\text{OCO}), \text{angle def}$ | 778                      | 758                                 | 790                                 |
| $\beta_{ip}(\text{OCO}), \text{angle def}$ | 831                      | 840                                 | 829                                 |
| $\nu(\text{C} - \text{C})$                 | NR                       | NR                                  | 873                                 |
| $\nu(\text{C} - \text{C})$                 | 894                      | 900                                 | NR                                  |
| $\nu(\text{C} - \text{C})$                 | 955                      | 958                                 | 942                                 |
| $\nu(\text{C} - \text{C})$                 | 992                      | 996                                 | 992                                 |
| $\nu(\text{COH})$                          | 1089                     | 1090                                | 1087                                |
| $\nu(\text{COH})$                          | 1136                     | 1140                                | 1134                                |
| $\beta_{ip}(\text{C} - \text{H})$          | 1216 +/- 2               | 1090                                | NR                                  |
| $\beta_{ip}(\text{C} - \text{H})$          | 1274 +/- 2               | NR                                  | 1255                                |
| $\beta_{ip}(\text{C} - \text{H})$          | 1328                     | NR                                  | 1318                                |
| $(\text{COH}) \text{ angle def}$           | 1400 +/- 2,              | 1388                                | NR                                  |
| $\nu(\text{C} - \text{O})$                 | 1459 +/- 2               | NR                                  | 1453                                |
| $\nu(\text{C} = \text{O})$                 | 1730 +/- 2               | 1740                                | 1741                                |
| $\nu(\text{CH})$                           | 2935                     | NR                                  | 2939                                |
| $\nu(\text{OH})$                           | 3230 (est.)              | 3176                                | 3193                                |
| $\nu(\text{OH})$                           | 3540 (est.)              | NR                                  | NR                                  |

\*Where the uncertainty is unstated, it is +/- 1 cm<sup>-1</sup>.

Abbreviations: sym=symmetry; as, asymmetric;  $\nu$ , stretching;  $\tau$ , twisting;  $\omega$ , wagging;  $\beta$ , bending; r, rocking



## C | UV Absorption Cross-Sections for Liquids Analyzed

UV absorption spectroscopy was performed on all liquids using a Thermo Scientific GENESYS 10S UV-Vis spectrophotometer with a cuvette of distilled water as the calibration standard. The propagation distance of the HRS emission before exiting the cuvette is estimated to be 2 mm. The variation of UV transmission between 267 nm to 300 nm was 2% or less for all liquids except DMSO assuming a 2 mm path length for HRS light from the focal point to the cuvette wall (see Fig. S8).

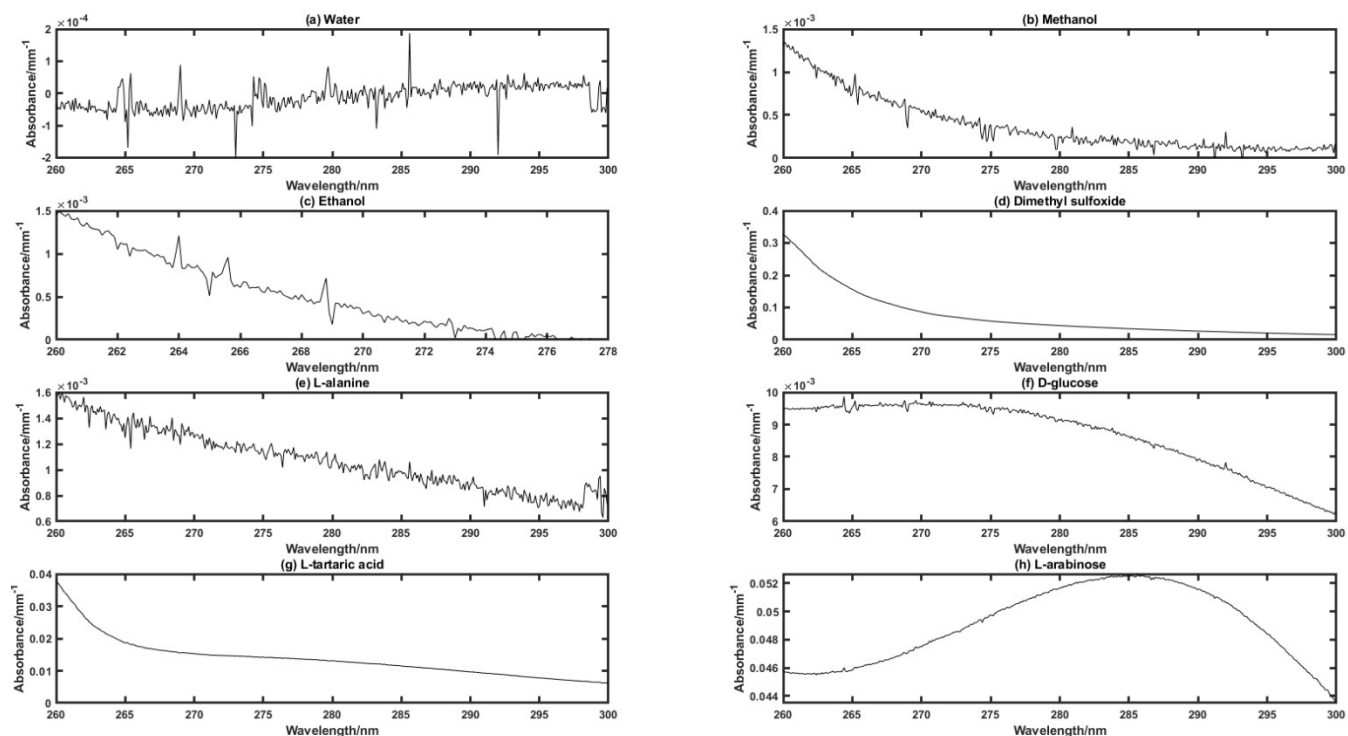

Fig. S8 The absorption spectra from 260 nm to 300 nm for all liquid samples studied at the concentrations used in the study.

## References

1. M. Okuno, *J. of Chemical Physics*, 2020, **152**(17), 174202.
2. C. B. Marble, X. Xu, G. I. Petrov, D. Wang, V. V. Yakovlev, *Proc. SPIE 11656, Advanced Chemical Microscopy for Life Science and Translational Medicine 2021*, 2021.
3. C. B. Marble, X. Xu, G. I. Petrov, D. Wang, V. V. Yakovlev, *Phys. Chem. Chem. Phys.* 2021, **23**, 24047-24051.
4. M. Okuno, *J. of Raman Spectroscopy*, 2021, **52**(4), 849-856.
5. E. Wiercigroch, E. Szafranec, K. Czamara, M. Z. Pacia, K. Majzner, K. Kochan, A. Kaczor, M. Baranska, K. Malek, *Spectrochimica Acta - Part A: Molecular and Biomolecular Spectroscopy*, 2017, **185**, 317-335.
6. M. Túlio, S. Rosadoa, M. Leonor, R. S. Duarteb, R. Faustoc, *J. Molecular Structure*, 1997, **410-411**, 343-348.
7. S. Kumar, A. K. Rai, S. B. Rai, D. K. Rai, A. N. Singh, and V. B. Singh, *J. Molecular Structure*, 2006, **791**, 23-29.
8. R. Bhattacharjee, Y. S. Jain, and H. D. Bist, *J. Raman Spectroscopy*, 1989, **20**(2), 91-97.
